# Supplementary material for: Suppression of citrus canker disease mediated by flagellin perception
Source: PubMed Central journal article supplement — Mol Plant Pathol. 2023 Jan 24;24(4):331–45. doi: 10.1111/mpp.13300 (PMC10013774; doi:10.1111/mpp.13300), 2023-01-24
Supplement: MPP-24-331-s002.pdf [file MPP-24-331-s002.pdf]

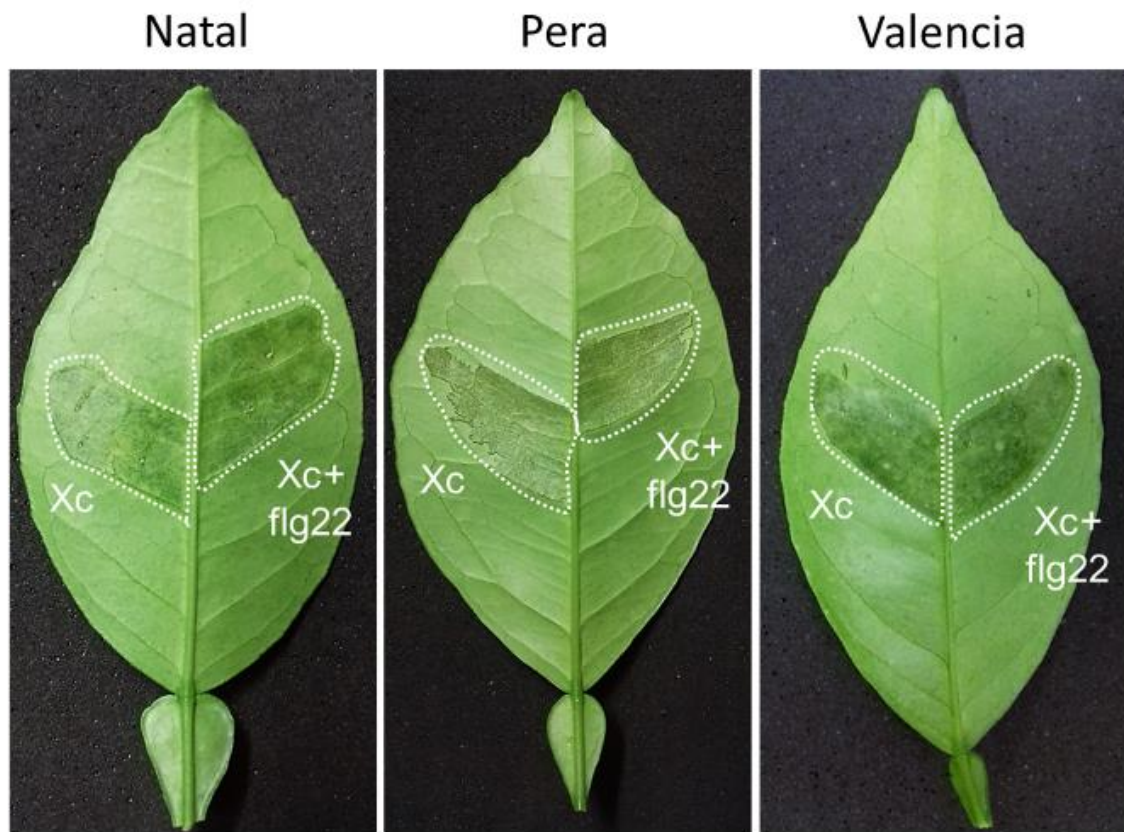

**Figure S2. The flg22 peptide does not protect sweet orange leaves from Xc infection.** 'Natal', 'Pera' and 'Valencia' leaves were infiltrated with a water suspension of Xc ( $OD_{600nm} = 0.05$ ) in the presence or absence of the flg22 peptide at 70  $\mu$ M final concentration (areas surrounded by dashed lines). Canker symptoms were recorded 10 d after bacterial inoculation.
