# Supplementary material for: Suppression of citrus canker disease mediated by flagellin perception
Source: PubMed Central journal article supplement — Mol Plant Pathol. 2023 Jan 24;24(4):331–45. doi: 10.1111/mpp.13300 (PMC10013774; doi:10.1111/mpp.13300), 2023-01-24
Supplement: MPP-24-331-s003.pdf [file MPP-24-331-s003.pdf]

**Table S1. Oligonucleotides used in this study.**

| <b>Name</b>                           | <b>Sequence (5' to 3')</b>                  | <b>Cloning sites</b>  |
|---------------------------------------|---------------------------------------------|-----------------------|
| <b><i>For mutant construction</i></b> |                                             |                       |
| F1XaΔfliC                             | GGCTGGCGCCAAGCTTAGCTGTCGGTGCAGTCGTCCA       | <i>HindIII</i>        |
| R1XaΔfliC                             | TCCTGCAGAGAAGCTTAGATATCCAGGCTGCTCAGGGTCG    |                       |
| F1XcΔfliC                             | ACCGAAGCTTGCTTCTGGATTTCAGCCGCGATG           | <i>HindIII</i>        |
| R1XcΔfliC                             | GTTGATTACCTGTGCCATGGTTTGATTCTCCTAAG         |                       |
| F2XcΔfliC                             | GGTTCATGGAGAACGTGCTGAGCCTGCTGCAG            |                       |
| R2XcΔfliC                             | CACGTCCAAGCTTCCAACACCGTCAGCGACCTC           |                       |
| <b><i>For complementation</i></b>     |                                             |                       |
| F-XaflfC                              | AGGAAAAACATATGGGTACCGCACAGGTAATCAACACCAACG  | <i>KpnI and BamHI</i> |
| R-XaflfC                              | AGGAAGGATCCTGCGGTACCTTACTGCAGCAGGCTCAGCACGT |                       |
| <b><i>For qRT-PCR</i></b>             |                                             | <b><i>GenBank</i></b> |
| <i>GAPDH</i> -F                       | GCTTTCCGTGTACCCACTGT                        | XM_006476919.3        |
| <i>GAPDH</i> -R                       | CTCTGACTCCGCCTTGATGG                        |                       |
| <i>FLS2</i> -F                        | GTTGGATGTTTCATCTGCAAGACC                    | XM_006478712.3        |
| <i>FLS2</i> -R                        | CTCATATACGCAAACCTCTGGTGCC                   |                       |
| <i>RLK8</i> -F                        | TCTTTCTGATCGCTCACCTTGT                      | XM_006464511.3        |
| <i>RLK8</i> -R                        | CCATGCCATACTCTGGGGCT                        |                       |
| <i>RLK10</i> -F                       | TTCGAGCTGTACCGCTACTC                        | XM_025094683.1        |
| <i>RLK10</i> -R                       | CTTCCCCTCTTCCCTCCTGG                        |                       |
| <i>RLK15</i> -F                       | GGCGCAGACAGTGGTTCTAT                        | XM_025092930.1        |
| <i>RLK15</i> -R                       | CGCTTTTTGAAGGCAAGCCA                        |                       |
| <i>RLKC</i> -F                        | TCTGCATAACGGGAGCGAAA                        | XM_006492787.2        |
| <i>RLKC</i> -R                        | TGGATGGTTCTCGCCAATCC                        |                       |
| <i>RLKR</i> -F                        | GAAGTGGGACTCCATGTTC                         | XM_025098008.1        |
| <i>RLKR</i> -R                        | TCGCTTGGAAATTCACCTTGG                       |                       |
| <i>FRK1</i> -F                        | TCGCTGACATTGAGTGTGGA                        | XM_015531278.2        |
| <i>FRK1</i> -R                        | CGCAGCAACTGACACTACCA                        |                       |
| <i>RBOHB</i> -F                       | GTAAATTGCGCTGCCGTCTC                        | XM_006487593.2        |
| <i>RBOHB</i> -R                       | GTCCAATCGCCAAAGTTCC                         |                       |
| <i>GST</i> -F                         | ACAGAATCCATTGATGCCAAGTG                     | XM_006493919.3        |

|                     |                           |                |
|---------------------|---------------------------|----------------|
| <i>GST-R</i>        | TCCAAACAGCAGCTCCCTTGT     |                |
| <i>PRX52-F</i>      | CTGCTTCGTTAATGGCTGCG      | XM_006468930.1 |
| <i>PRX52-R</i>      | CAAGCTGCTTCCAGACGAGT      |                |
| <i>WRKY22-F</i>     | TCAACCGAAAGGAGGGAAGA      | XM_006476427.3 |
| <i>WRKY22-R</i>     | CGTATTTACGCCAAGCCAC       |                |
| <i>WRKY72-F</i>     | CCAAGAAGCTAGAAAGGTGGGA    | XM_006482610.3 |
| <i>WRKY72-R</i>     | ATTTCTCATGCCTGCTGGGT      |                |
| <i>BHLH25-F</i>     | TGTGGAGAAGGTTTTGAACAGG    | XM_006486736.3 |
| <i>BHLH25-R</i>     | TCCCTCTGATGGAATGGCCT      |                |
| <i>MYB63-F</i>      | CCTAAACAAGCTGGCCTTCTG     | XM_006475270.2 |
| <i>MYB63-R</i>      | CCCGTTTCACGTCTGGTCTC      |                |
| <i>MYB102-F</i>     | CAGTATTCTCGAAACAAGTGG     | XM_025094694.1 |
| <i>MYB102-R</i>     | CTTGATTTTCATTGTTCGGTACGTC |                |
| <i>AP2/B3-F</i>     | GTGTGCCCTGTGACTGACTGA     | XM_015531385.2 |
| <i>AP2/B3-R</i>     | TAGGCCATGTGCGAAGACTG      |                |
| <i>SAG13-F</i>      | TCCCTTTACTGAACCTCTTCTTGG  | XM_006488327.2 |
| <i>SAG13-R</i>      | ATGCCACCAGTGAAGACACC      |                |
| <i>ACD2-F</i>       | GTGGCCTTCCTTCCTCTCATATTG  | XM_006466545.3 |
| <i>ACD2-R</i>       | TGTTTCATGGCACTTCCCGTT     |                |
| <i>PUB24-F</i>      | GACGATCGGGCCATTCTGAT      | XM_006481797.2 |
| <i>PUB24-R</i>      | CTTCGACACAGTACCGACCC      |                |
| <i>CYP93A-F</i>     | TGCACCCATGGATTTACTTGA     | XM_015532272.2 |
| <i>CYP93A-R</i>     | CCAGCAGCGAAAATATCCAGG     |                |
| <i>SubProtase-F</i> | GCCCACCTCTTACGTTGACA      | XM_025100570.1 |
| <i>SubProtase-R</i> | TCGCAGTCGCATTTCTGGTA      |                |
| <i>CRR38-F</i>      | GCAAGCGATGCCCTTACAAC      | XM_006469666.3 |
| <i>CRR38-R</i>      | GGTGACCACTCTCACGTTCC      |                |
| <i>CCoARed-F</i>    | TCCAATCCCTACCAAGTGTAAG    | XM_006493289.3 |
| <i>CCoARed-R</i>    | CACTGCCTCACTGGCGTAAA      |                |
| <i>GLS9-F</i>       | AAATCCGCTGAAGTGCCGTA      | XM_006492603.3 |
| <i>GLS9-R</i>       | AACACGAGAGGCTTTGCTGA      |                |
| <i>SETD-F</i>       | AGAGACAAATGGCTGGACCC      | XM_025092527.1 |
| <i>SETD-R</i>       | GCAAGTTCCTTTTGCCCTCG      |                |

***For expression in E. coli***

|         |                                       |                                |
|---------|---------------------------------------|--------------------------------|
| F-XcflI | CGCGCGGCAGCCATATGCAACCGATTACATTTTTTC  | <i>NdeI</i> and <i>HindIII</i> |
| R-XcflI | AGTGCGGCCGCAAGCTTATCCCCTTACCACATGCAT  |                                |
| F-XafI  | CGCGCGGCAGCCATATGATTGAACAAATTCAAGGCAC | <i>NdeI</i> and <i>HindIII</i> |
| R-XafI  | AGTGCGGCCGCAAGCTTCATATCTGCATTTTAGAAAC |                                |

---
