# Supplementary material for: Suppression of citrus canker disease mediated by flagellin perception
Source: PubMed Central journal article supplement — Mol Plant Pathol. 2023 Jan 24;24(4):331–45. doi: 10.1111/mpp.13300 (PMC10013774; doi:10.1111/mpp.13300), 2023-01-24
Supplement: MPP-24-331-s005.pdf [file MPP-24-331-s005.pdf]

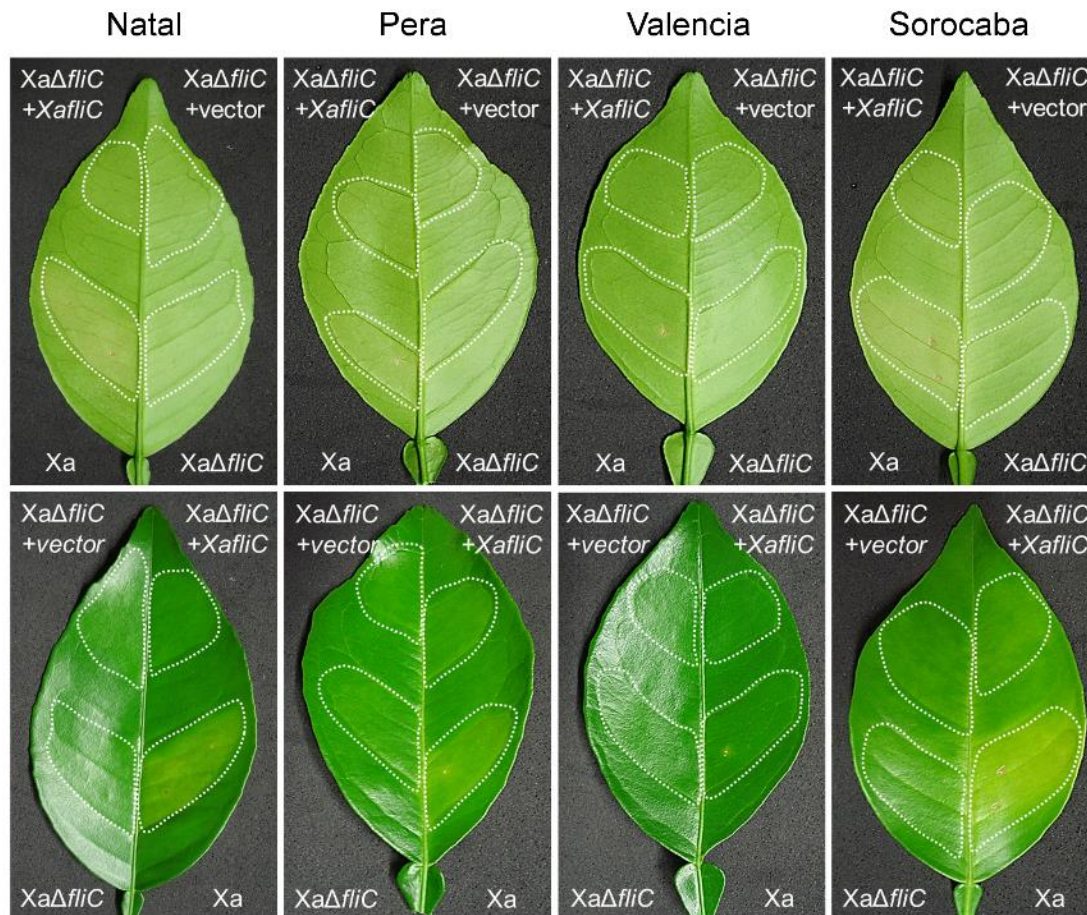

**Figure S3. Deletion of the *fliC* gene in *Xa* is not sufficient to induce canker symptoms on sweet oranges.** ‘Natal’, ‘Pera’, ‘Valencia’ and ‘Sorocaba’ leaves were infiltrated with a water suspension (OD<sub>600nm</sub> = 0.1) of *Xa* or the corresponding *XaΔfliC* mutants (areas surrounded by dashed lines). While no canker pustule developed in the leaf sectors infiltrated with the *XaΔfliC* mutant, a reduction in the yellowing of the leaf is observed in these leaf sectors, compared to leaf sectors infiltrated with *Xa*, particularly in ‘Natal’, ‘Pera’ and ‘Sorocaba’ leaves.
